# Supplementary material
Source: Research Square preprint supplement (doi:10.21203/rs.3.rs-9626289/v1)
Supplement: Supplementary file 1 [file 8e99507b0a2cdc37358f10f1.docx]

**Supplementary information**

***Table S*1.** Summary of Meteorological factors and Socio–economic factors in China, 2005–2020.

***Figure S*1.** The monthly and annual incidence of amoebic dysentery (A) and bacillary dysentery (B) in China, 2005-2020.

***Figure S*2*.*** Spatiotemporal variation in the incidence of amoebic dysentery in China, 2005-2020.

***Figure* *S*3.** Spatiotemporal variation in the incidence of bacillary dysentery in China, 2005-2020.

***Figure* *S*4.** Month of annual peak of amoebic dysentery and bacillary dysentery at the provincial level in China, 2005-2020.

***Figure* *S*5.** The average monthly incidence rate of amoebic dysentery in each province of China, 2005-2020.

***Figure* *S*6.** The average monthly incidence rate of bacillary dysentery in each province of China, 2005-2020.

***Table S*1**. Summary of Meteorological factors and Socio–economic factors in China, 2005–2020.

| Driving factors | Variable | Average | Frequency distribution | | |
| --- | --- | --- | --- | --- | --- |
| **5% Percentile** | **50% Percentile** | **95% Percentile** |
| Meteorological factors | Temperature (℃) | 13.67 | 4.13 | 14.83 | 22.32 |
|  | Rainfall (mm) | 8939.52 | 1639.76 | 7721.9 | 17721.65 |
|  | Relative humidity (%) | 66.66 | 50.42 | 67.82 | 80.25 |
|  | Wind speed (m/s) | 2.15 | 1.57 | 2.18 | 2.82 |
| Socioeconomic factors | Per capita GDP (RMB) | 41841.52 | 10798.75 | 35991 | 96502 |
|  | COD (10,000 tons) | 50.07 | 4.56 | 35.35 | 135.04 |
|  | Medical personnel (per 1,000 population) | 5.13 | 2.84 | 5.05 | 7.78 |
|  | Waste disposal volume (10,000 tons) | 590.18 | 80.33 | 492.47 | 1538.26 |
|  | Toilets (unit) | 4104.20 | 463.50 | 3699.00 | 9691.75 |
|  | Population density (persons/sq.km) | 439.43 | 7.96 | 270.60 | 1241.01 |


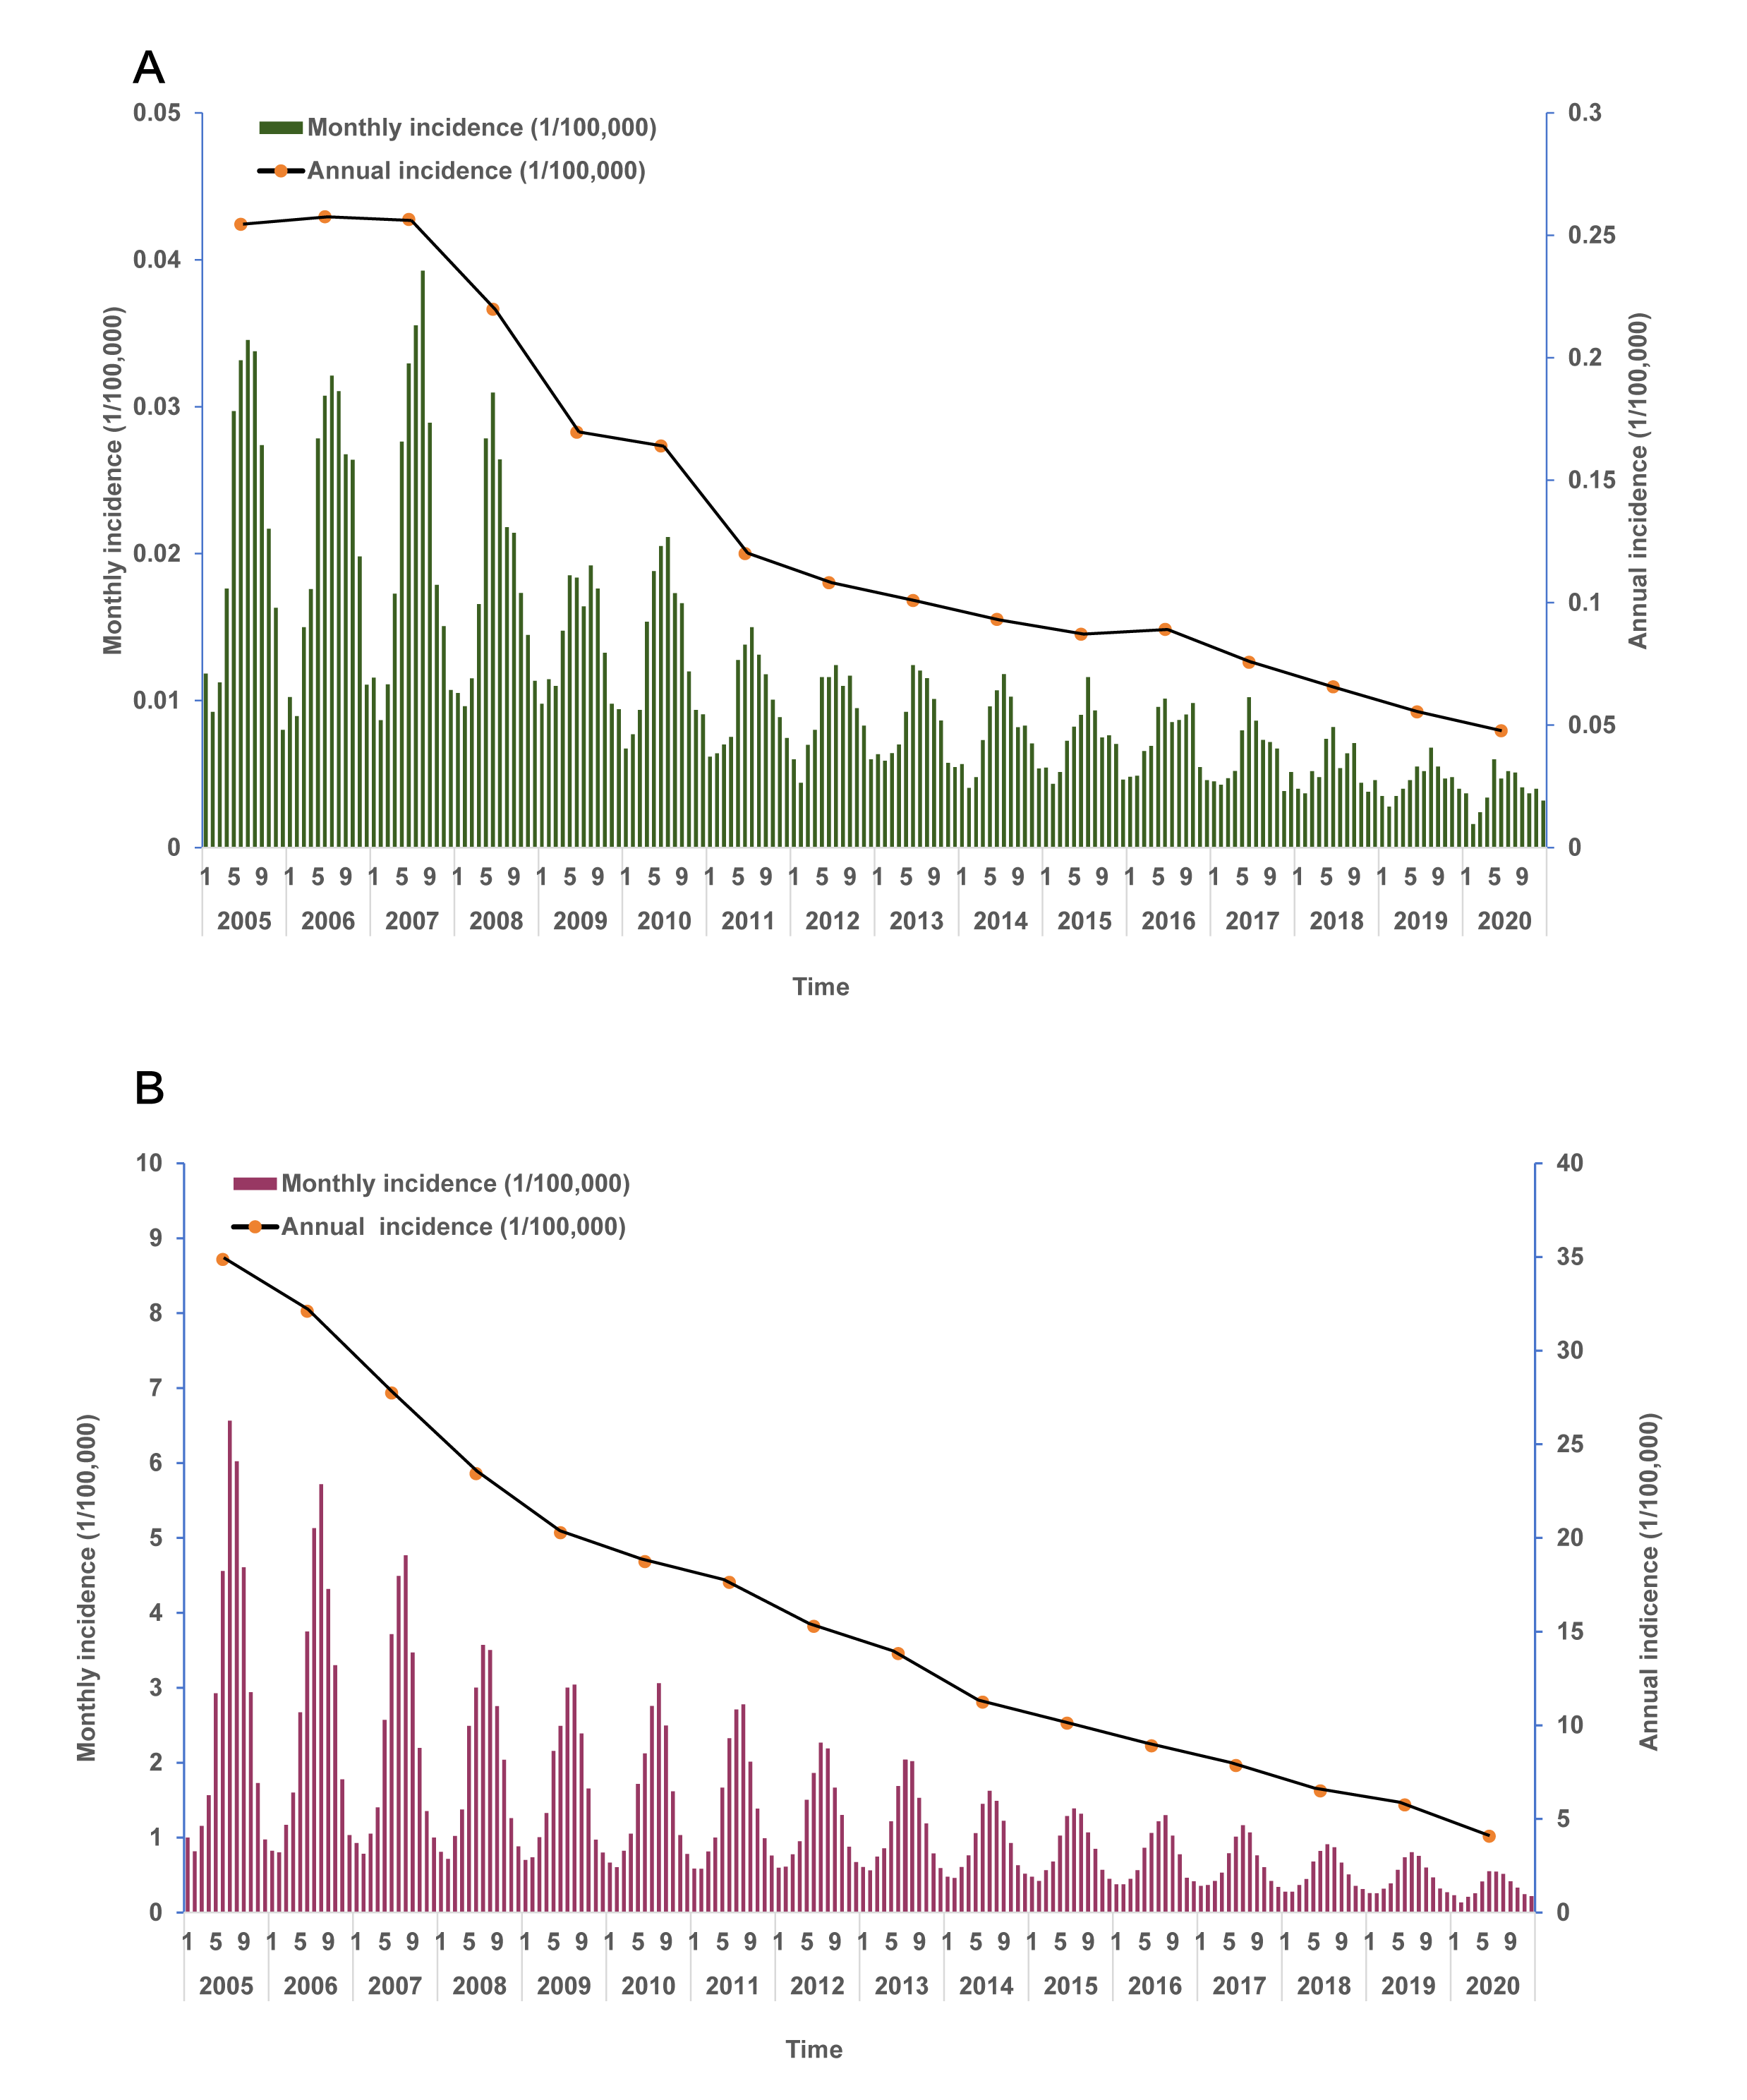


***Figure* *S*1.** The monthly and annual incidence of amoebic dysentery (A) and bacillary dysentery (B) in China, 2005-2020.


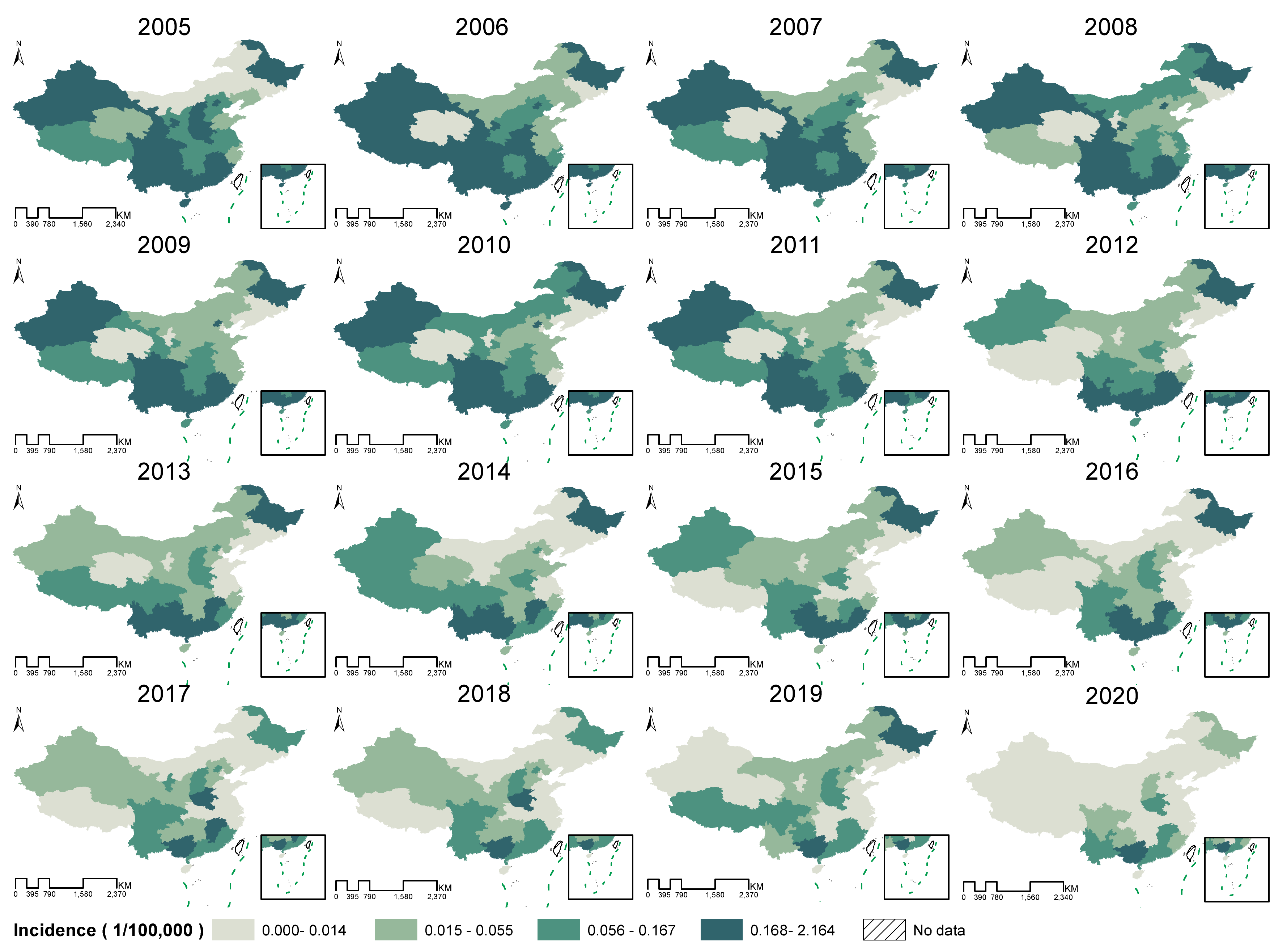


***Figure S*2.** Spatiotemporal variation in the incidence of amoebic dysentery in China, 2005-2020.

**
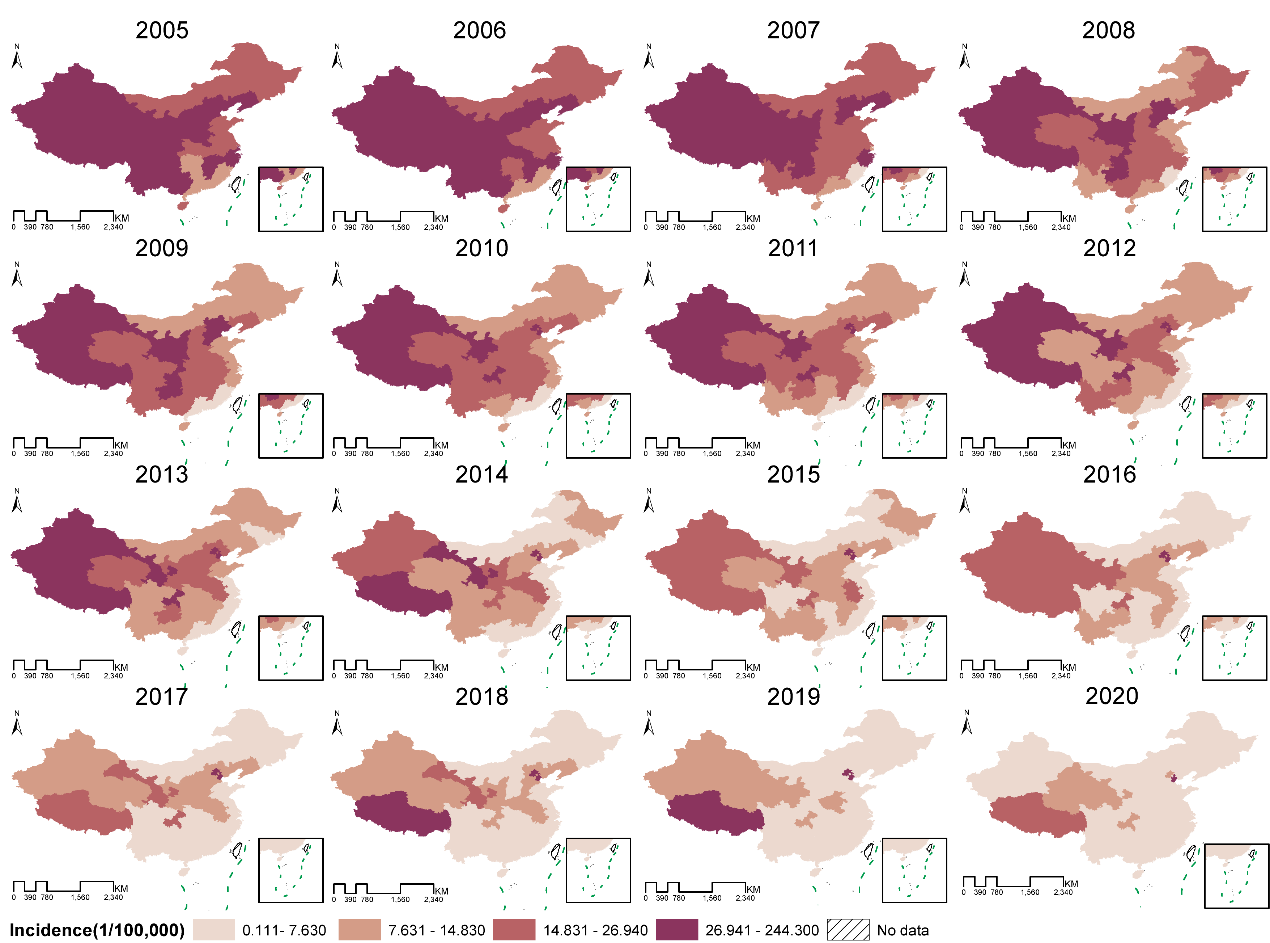
**

***Figure S*3.** Spatiotemporal variation in the incidence of bacillary dysentery in China, 2005-2020.


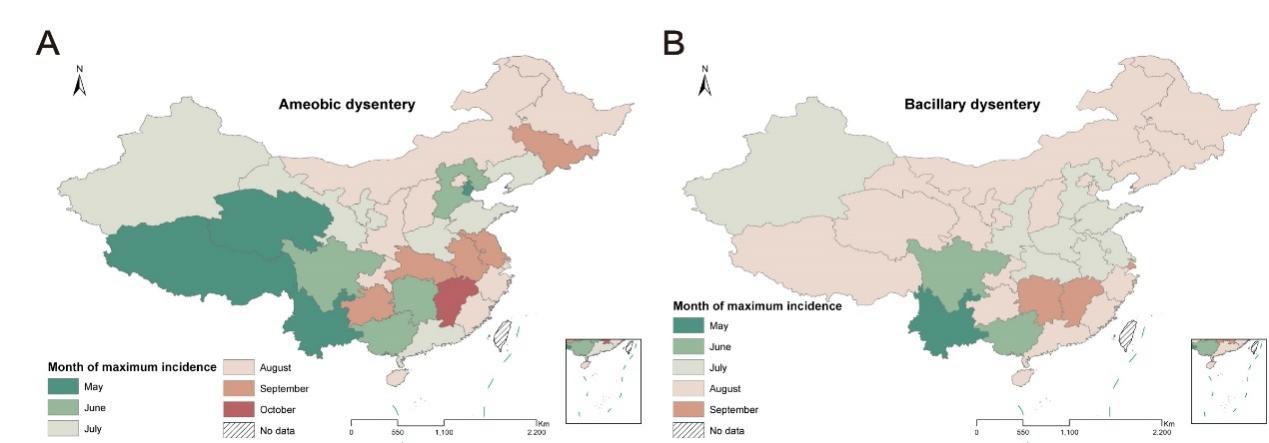


***Figure* *S*4.** Month of annual peak of amoebic dysentery (A) and bacillary dysentery (B) at the provincial level in China, 2005-2020.

**
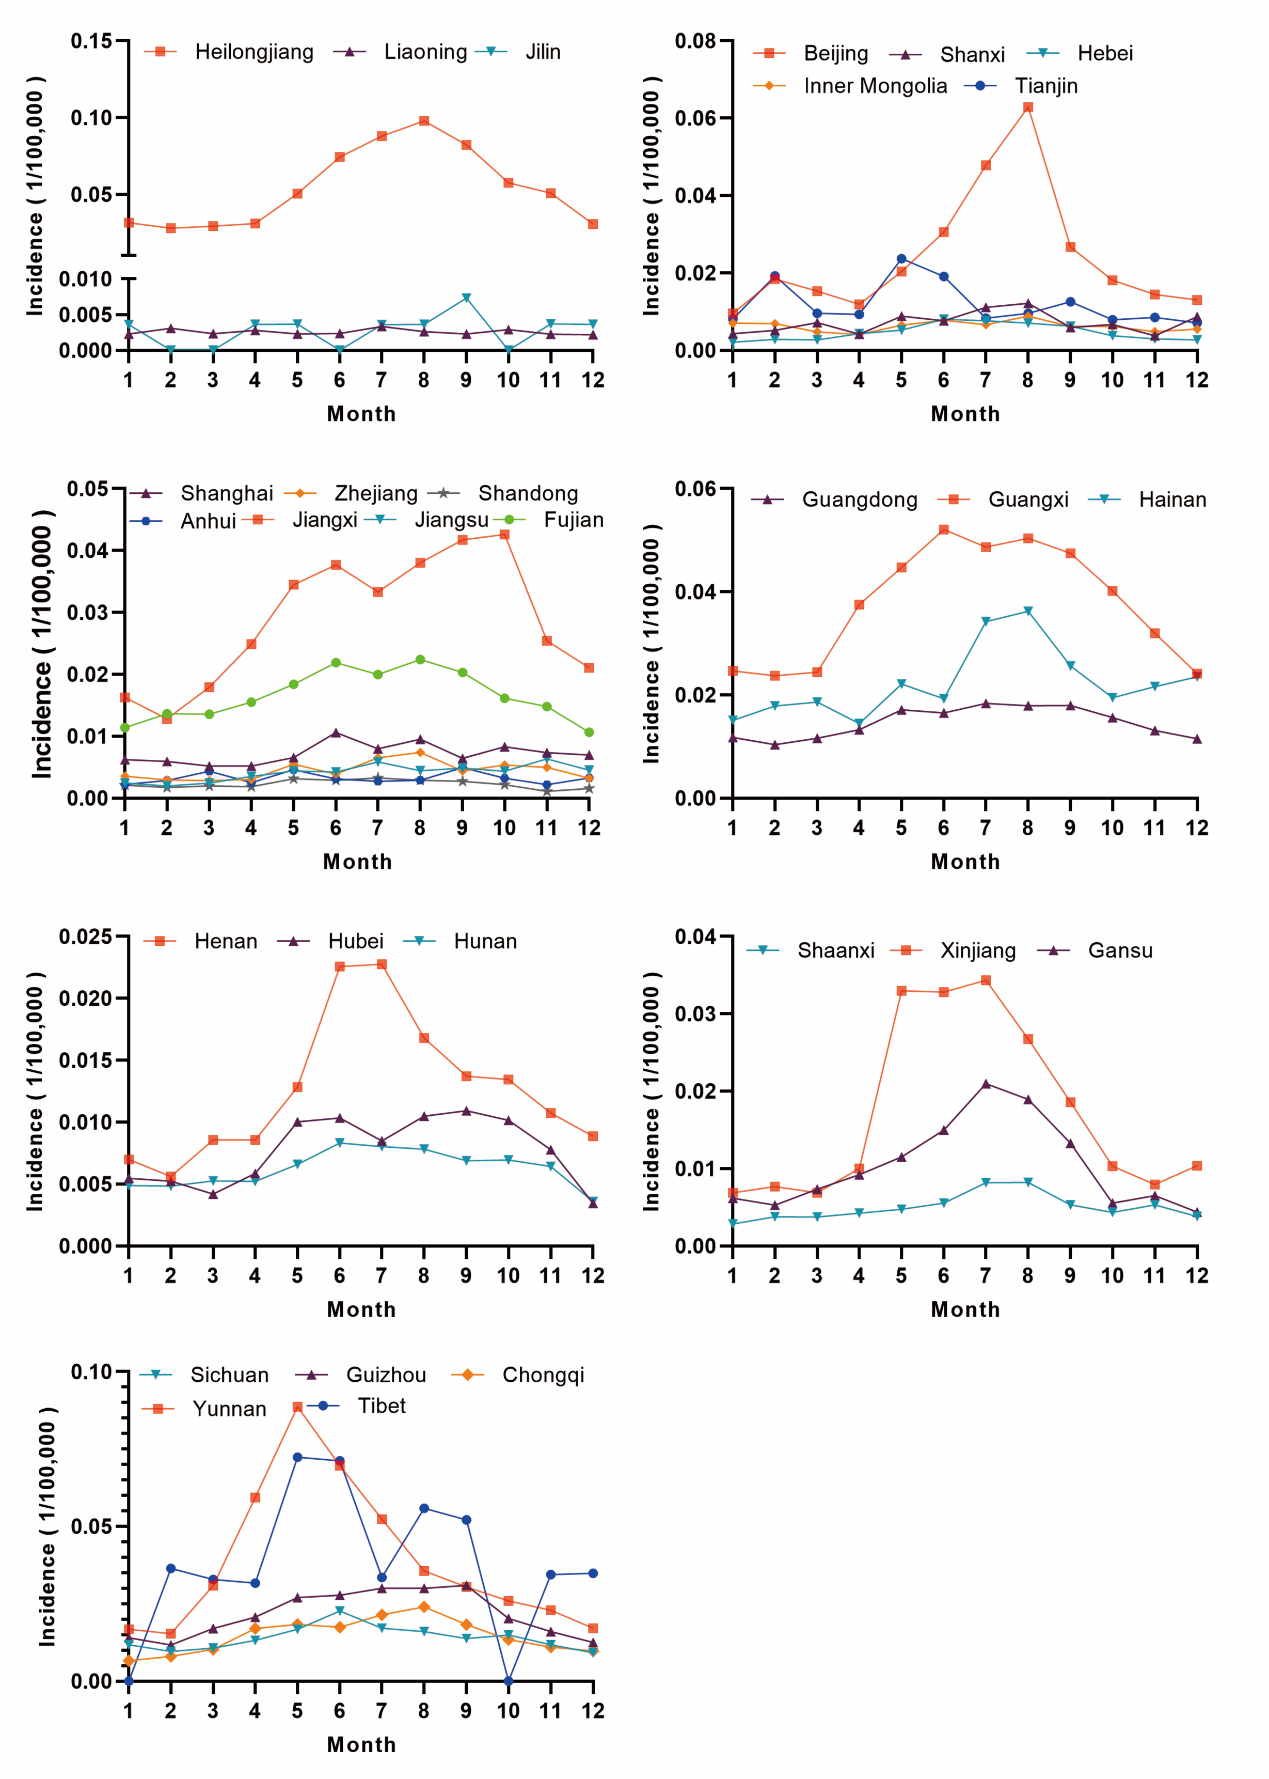
**

***Figure* *S*5*.*** The average monthly incidence rate of amoebic dysentery in each province of China, 2005-2020 (The order of each map is for each of the seven major regions of China, i.e., Northeast, North, East, South, Central, Northwest, and Southwest).

**
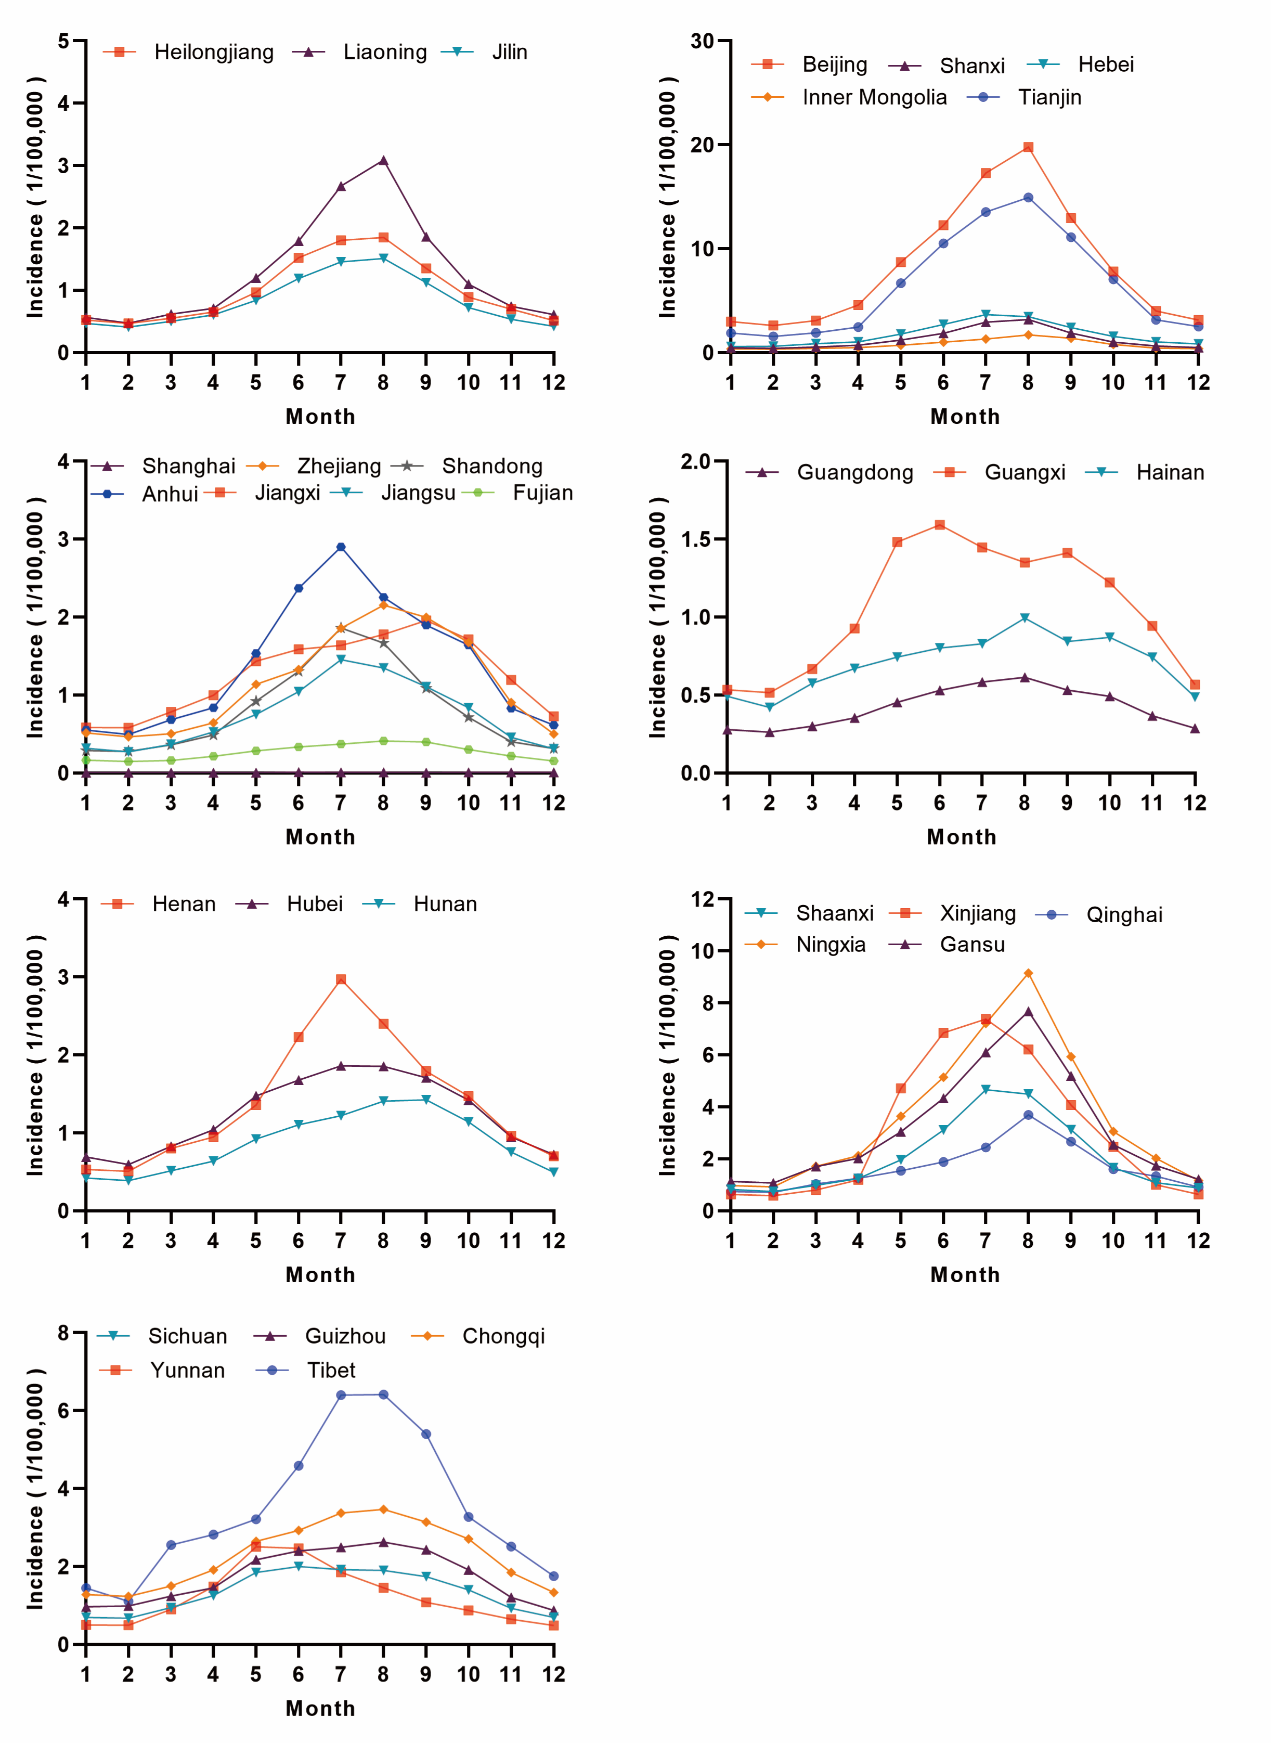
**

***Figure* *S*6*.*** The average monthly incidence rate of bacillary dysentery in each province of China, 2005-2020 (The order of each map is for each of the seven major regions of China, i.e., Northeast, North, East, South, Central, Northwest, and Southwest).
